# Supplementary material for: Use of deep learning for the classification of hyperplastic lymph node and common subtypes of canine lymphomas: a preliminary study
Source: Front Vet Sci. 2024 Jan 12;10:1309877. doi: 10.3389/fvets.2023.1309877 (PMC10811236; doi:10.3389/fvets.2023.1309877)
Supplement: Supplementary TABLE S1 — Hyperparameters after optimization. [file Table_1.XLSX]

## Sheet: Sheet1
Hyperparameter	Setting
Solver	sgdm
Initial Learn Rate	0.0057
Valdation Frequency	50
Max Epochs	30
Mini Batch Size	128
Execution Environment	auto
Sequence Length	longest
Sequence Padding Value	0
Sequemce Padding Direction	right
L2 Regularisation	0.0001
Gradient Threshold Method	l2norm
Gradient Threshold	Inf
Validation Patience	Inf
Shuffle	every-epoch
Checkpoint Path	Specify checkpoint path
Checkpoint Frequency	1
Checkpoint Frequency Unit	epoch
Learn Rate Schedule	none
Learn Rate Drop Factor	0.1
Learn Rate Drop Period	10
Batch normalization Statistics	population
Output Network	last-iteration
Momentum	0.9
