# Supplementary material for: Use of deep learning for the classification of hyperplastic lymph node and common subtypes of canine lymphomas: a preliminary study
Source: Front Vet Sci. 2024 Jan 12;10:1309877. doi: 10.3389/fvets.2023.1309877 (PMC10811236; doi:10.3389/fvets.2023.1309877)
Supplement: Supplementary TABLE S2 — Validation accuracy running 3 experiments using 3 different solvers. [file Table_2.XLSX]

## Sheet: Sheet1
Attempt	WeightLearnFactor	BiasLearnFactor	Solver	InitialLearnRate	Validation accuracy result (%)
1	2	2	sgdm	0.01	0.9256
2	2	2	sgdm	0.0075	0.9912
3	2	2	sgdm	0.005	0.9934
4	2	2	adam	0.001	0.4114
5	2	2	adam	0.0007	0.7155
6	2	2	adam	0.0005	0.9737
7	2	2	rmsprop	0.001	0.3807
8	2	2	rmsprop	0.0075	0.4923
9	2	2	rmsprop	0.005	0.6127
